# Supplementary material
Source: PubMed Central journal article supplement (PMC3421485)
Supplement: JCM.06810-11_zjm999091800so2.pdf [file JCM.06810-11_zjm999091800so2.pdf]

TABLE S1. The *H. cinaedi* housekeeping genes used in this study.

| Accession no.<br>or locus tag                                                            | Gene name / Product                                                       | Gene<br>length<br>(bp) | PCR<br>length<br>(bp) | Polymorphism<br>sites | No. of<br>alleles | Representative organisms using the gene for MLST                 |
|------------------------------------------------------------------------------------------|---------------------------------------------------------------------------|------------------------|-----------------------|-----------------------|-------------------|------------------------------------------------------------------|
| <b>Genes analyzed in 50 isolates from Japan and 6 reference strains<sup>#1</sup></b>     |                                                                           |                        |                       |                       |                   |                                                                  |
| AY596254                                                                                 | 23S rRNA / 23S rRNA                                                       | 2718                   | 762                   | 4                     | 5                 | -                                                                |
| HCCG_01345                                                                               | <i>ppa</i> / inorganic pyrophosphatase                                    | 522                    | 514                   | 13                    | 5                 | <i>Helicobacter pylori</i> , <i>Moraxella catarrhalis</i>        |
| HCCG_00537                                                                               | <i>aspA</i> / aspartate ammonia-lyase                                     | 1440                   | 650                   | 6                     | 5                 | <i>Campylobacter jejuni</i> , <i>Campylobacter lari</i>          |
| HCCG_00648                                                                               | <i>aroE</i> / shikimate 5-dehydrogenase                                   | 792                    | 688                   | 21                    | 6                 | <i>Staphylococcus aureus</i> , <i>Propionibacterium acnes</i>    |
| HCCG_02167                                                                               | <i>atpA</i> / ATP synthase subunit alpha                                  | 1515                   | 646                   | 5                     | 5                 | <i>Helicobacter pylori</i> , <i>Campylobacter lari</i>           |
| HCCG_01495                                                                               | <i>tkt</i> / transketolase                                                | 1956                   | 665                   | 3                     | 4                 | <i>Campylobacter jejuni</i> , <i>Campylobacter lari</i>          |
| HCCG_01069                                                                               | <i>cdtB</i> / cytolethal distending toxin B subunit                       | 807                    | 635                   | 9                     | 3                 | -                                                                |
| <b>Genes analyzed in 8 isolates from 4 hospitals (2 for each hospital) and CCUG18818</b> |                                                                           |                        |                       |                       |                   |                                                                  |
| HCCG_01446                                                                               | <i>glyA</i> / serine hydroxymethyltransferase                             | 1251                   | 639                   | 6                     | 4                 | <i>Campylobacter jejuni</i> , <i>Clostridium difficile</i>       |
| HCCG_01783                                                                               | <i>glnA</i> / glutamine synthetase                                        | 1479                   | 677                   | 5                     | 2                 | <i>Campylobacter jejuni</i> , <i>Campylobacter lari</i>          |
| HCCG_01698                                                                               | <i>gltA</i> / type II citrate synthase                                    | 1284                   | 649                   | 6 <sup>#2</sup>       | 2                 | <i>Campylobacter jejuni</i> , <i>Campylobacter helveticus</i>    |
| HCCG_01071                                                                               | <i>efp</i> / elongation factor P                                          | 564                    | 483                   | 1                     | 2                 | <i>Helicobacter pylori</i> , <i>Moraxella catarrhalis</i>        |
| HCCG_00708                                                                               | <i>hsp60</i> / Chaperonin GroEL                                           | 1644                   | 569                   | 1                     | 2                 | <i>Yersinia ruckeri</i>                                          |
| HCCG_01373                                                                               | <i>sodA</i> / superoxide dismutase                                        | 639                    | 639                   | 4 <sup>#2</sup>       | 2                 | <i>Clostridium difficile</i>                                     |
| HCCG_00654                                                                               | <i>mutY</i> / A/G-specific adenine glycosylase                            | 1044                   | 655                   | 1 <sup>#2</sup>       | 2                 | <i>Helicobacter pylori</i> , <i>Moraxella catarrhalis</i>        |
| HCCG_02123                                                                               | <i>yphC</i> / GTP-binding protein engA                                    | 1584                   | 613                   | 3 <sup>#2</sup>       | 2                 | <i>Helicobacter pylori</i>                                       |
| HCCG_00133                                                                               | <i>rpoB</i> / GTP-binding protein engA                                    | 8676                   | 697                   | 1                     | 2                 | <i>Haemophilus parasuis</i> , <i>Corynebacterium diphtheriae</i> |
| HCCG_01182                                                                               | <i>trpC</i> / bifunctional DNA-directed RNA polymerase subunit beta       | 1509                   | 646                   | 0                     | 1                 | <i>Helicobacter pylori</i>                                       |
| HCCG_00798                                                                               | <i>glmM</i> / 2,3-bisphosphoglycerate-independent phosphoglycerate mutase | 1470                   | 644                   | 0                     | 1                 | <i>Campylobacter jejuni</i> , <i>Campylobacter lari</i>          |
| HCCG_00755                                                                               | <i>gyrB</i> / DNA gyrase subunit B                                        | 2319                   | 692                   | 0                     | 1                 | <i>Escherichia coli</i> , <i>Acinetobacter baumannii</i>         |
| HCCG_01929                                                                               | <i>recA</i> / protein recA                                                | 1035                   | 621                   | 0                     | 1                 | <i>Escherichia coli</i> , <i>Haemophilus influenzae</i>          |
| HCCG_01104                                                                               | <i>lepA</i> / GTP-binding protein lepA                                    | 1818                   | 699                   | 0                     | 1                 | <i>Propionibacterium acnes</i> , <i>Burkholderia cepacia</i>     |

<sup>#1</sup> The six reference strains include CCUG18818, CCUG18819, CCUG43521, MIT99-5915, MIT00-5434, and MIT01-5002

<sup>#2</sup> The sequences in 8 isolates were identical and polymorphisms was detected between CCUG18818 and 8 isolates.
